# Supplementary material
Source: MDPI journal article supplement (https://www.mdpi.com/2073-4433/12/12/1581)
Supplement: s1 [file s1]

## Supplementary Material

<https://dieselnet.com/standards/eu> (accessed on 15.09.2021)

Table S1. Euro Norms for the gasoline cars

| emission                      | EURO 1<br>[1993] | EURO 2<br>[1997] | EURO 3<br>[2001] | EURO 4<br>[2006] | EURO 5<br>[2011] | EURO 6<br>[2015]        |
|-------------------------------|------------------|------------------|------------------|------------------|------------------|-------------------------|
| <a href="#">CO</a> [g/km]     | 2,72             | 2,2              | 2,3              | 1                | 1                | 1                       |
| <a href="#">HC</a> [g/km]     | –                | –                | 0,2              | 0,1              | 0,1              | 0,1                     |
| <a href="#">NOx</a> [g/km]    | –                | –                | 0,15             | 0,08             | 0,06             | 0,06                    |
| <a href="#">HC+NOx</a> [g/km] | 0,97             | 0,5              | –                | –                | –                | –                       |
| <a href="#">PM</a> [g/km]     | –                | –                | –                | –                | 0,005*           | 0,005*                  |
| <a href="#">PN</a> [1/km]     | –                | –                | –                | –                | –                | $6.0 \times 10^{11} **$ |

\* vehicles using DI engines; 0.0045 g/km using the PMP measurement procedure

\*\* vehicles using DI engines;  $6.0 \times 10^{12}$  1/km in first 3 years from Euro 6 effective dates

Table S2. Euro Norms for the diesel cars

| emission                      | EURO 1<br>[1992] | EURO 2<br>[1996] | EURO 3<br>[2001] | EURO 4<br>[2006] | EURO 5<br>[2011]        | EURO 6<br>[2014]        |
|-------------------------------|------------------|------------------|------------------|------------------|-------------------------|-------------------------|
| <a href="#">CO</a> [g/km]     | 2,72             | 1                | 0,64             | 0,5              | 0,5                     | 0,5                     |
| <a href="#">HC</a> [g/km]     | –                | –                | –                | –                | –                       | –                       |
| <a href="#">NOx</a> [g/km]    | –                | –                | 0,5              | 0,25             | 0,18                    | 0,08                    |
| <a href="#">HC+NOx</a> [g/km] | 0,97             | 0,7              | 0,56             | 0,3              | 0,23                    | 0,17                    |
| <a href="#">PM</a> [g/km]     | 0,14             | 0,08             | 0,05             | 0,025            | 0,005*                  | 0,005*                  |
| <a href="#">PN</a> [1/km]     | –                | –                | –                | –                | $6.0 \times 10^{11} **$ | $6.0 \times 10^{11} **$ |

\* 0.0045 g/km using the PMP measurement procedure

\*\* vehicles using DI engines;  $6.0 \times 10^{12}$  1/km in first 3 years from Euro 6 effective dates

Table S3. Euro Norms for HDV diesel cars

| emission                       | EURO 1<br>[1992] | EURO 2<br>[1998] | EURO 3<br>[2000] | EURO 4<br>[2005] | EURO 5<br>[2008] | EURO 6<br>[2013]     |
|--------------------------------|------------------|------------------|------------------|------------------|------------------|----------------------|
| <a href="#">CO</a> [g/kWh]     | 4,5              | 4,0              | 2,1              | 1,5              | 1,5              | 1,5                  |
| <a href="#">HC</a> [g/kWh]     | 1,1              | 1,1              | 0,66             | 0,46             | 0,46             | 0,13                 |
| <a href="#">NOx</a> [g/kWh]    | 8,0              | 7,0              | 5,0              | 3,5              | 2,0              | 0,4                  |
| <a href="#">HC+NOx</a> [g/kWh] | –                | –                | –                | –                | –                | –                    |
| <a href="#">PM</a> [g/kWh]     | 0,612            | 0,25             | 0,10             | 0,02             | 0,02             | 0,01                 |
| <a href="#">PN</a> [ [1/kWh]   | –                | –                | –                | –                | –                | $8.0 \times 10^{11}$ |
